# Supplementary material for: Production and Characterization of a Clotrimazole Liposphere Gel for Candidiasis Treatment
Source: Polymers (Basel). 2018 Feb 8;10(2):160. doi: 10.3390/polym10020160 (PMC6414984; doi:10.3390/polym10020160)
Supplement: Supplementary file 1 [file polymers-10-00160-s001.pdf]

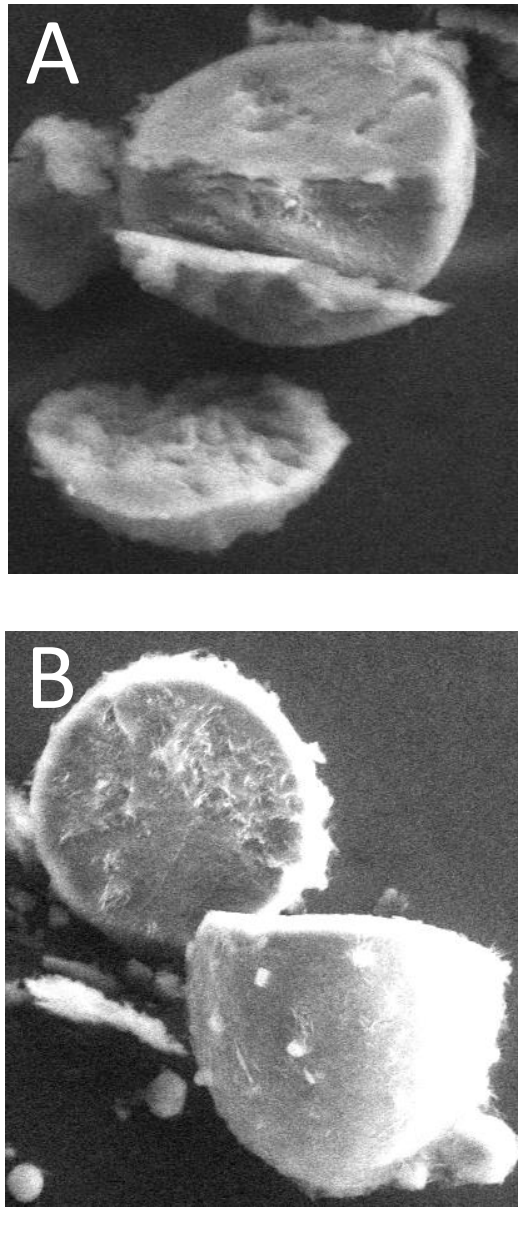

**Figure S1:** Variable pressure scanning electron microscopy images of  $\text{LS}_{\text{TRIST}}\text{-CLO}$  (A) and  $\text{LS}_{\text{TRIST/AL1}}\text{-CLO}$  (B). Bar represents 20  $\mu\text{m}$ .

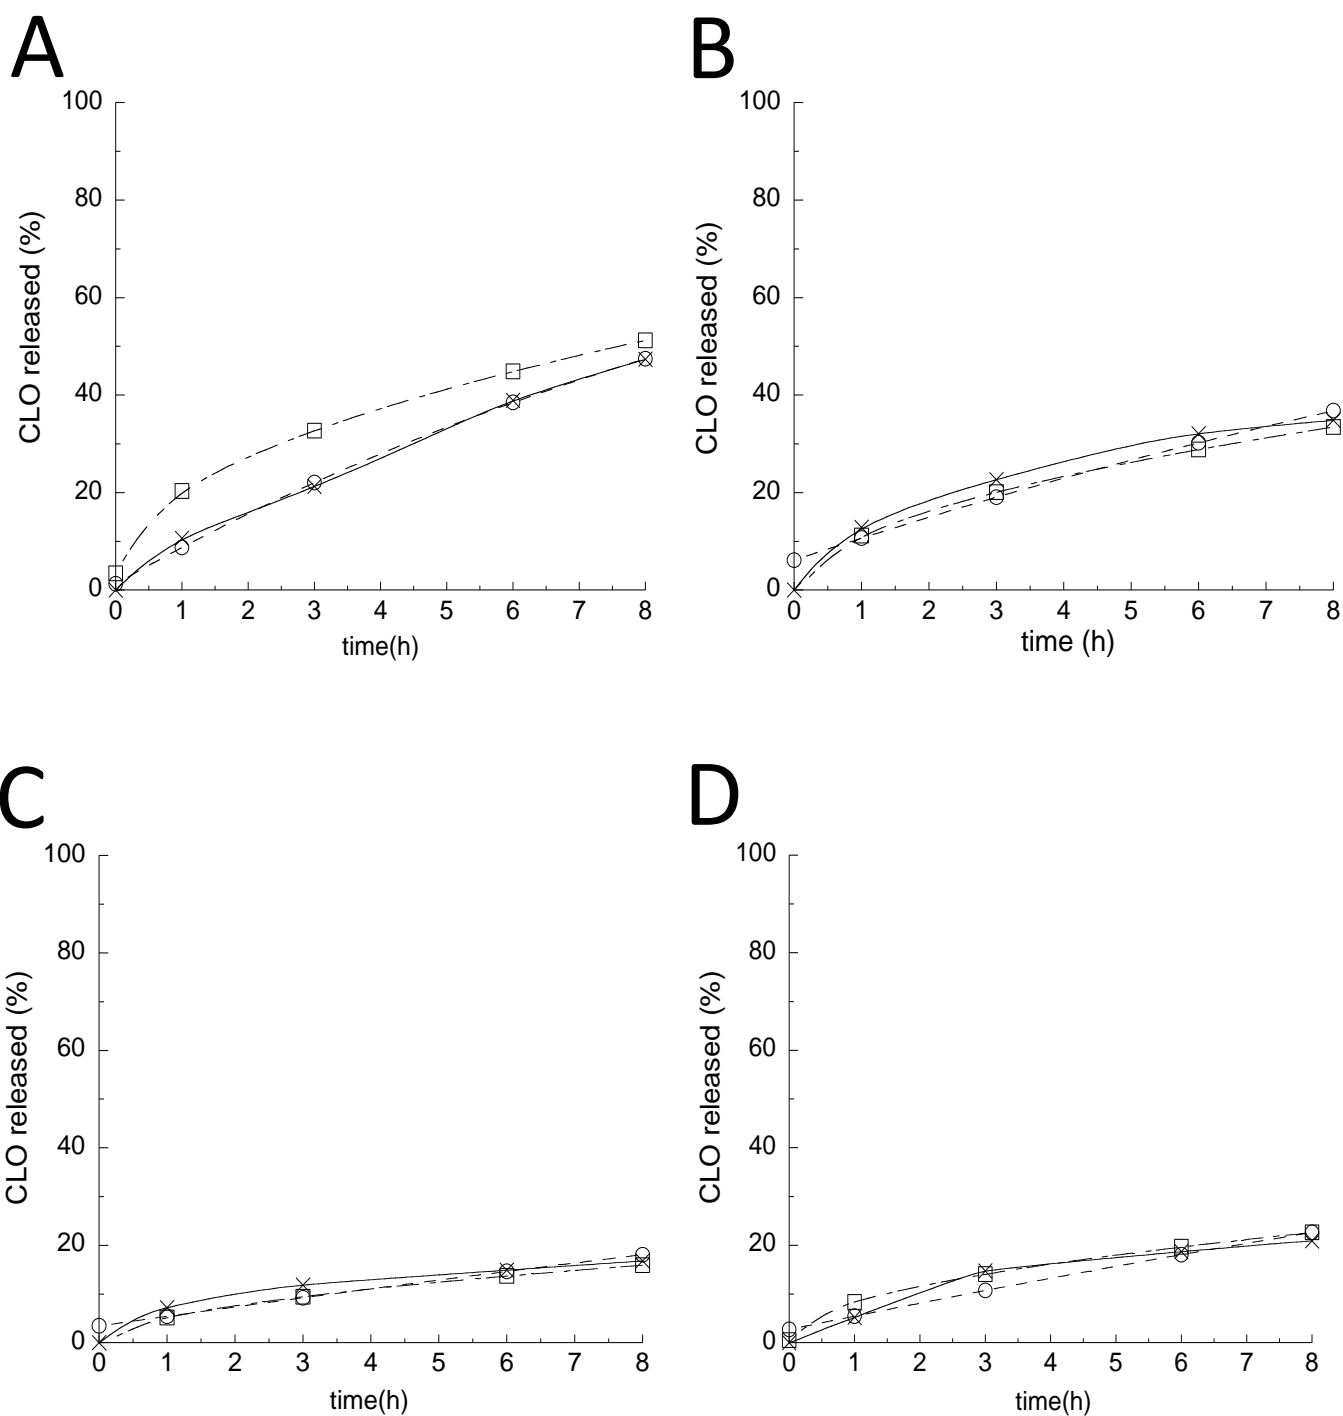

**Figure S2:** Comparison of the theoretical (x) and experimental CLO profiles from  $LS_{TRIST}$ -CLO (A),  $LS_{TRIST/AL1}$ -CLO, (B), Gel  $LS_{TRIST}$ -CLO (C) and Gel  $LS_{TRIST/AL1}$ -CLO (D), The theoretical curves were obtained using the coefficient calculated by linear regression of the linearized form of equation (4) (□) and equation (5) (○).
